# Supplementary material for: Drug–Drug Interactions in Patients with Acute Respiratory Distress Syndrome
Source: MDPI journal article supplement (doi:10.3390/pharmaceutics16030303), 2024-02-21
Supplement: s1 [file s1]

Article

# Drug–Drug Interactions in Patients with Acute Respiratory Distress Syndrome

Thorsten Bischof <sup>1</sup>, Christoph Schaller <sup>1</sup>, Nina Buchtele <sup>2</sup>, Thomas Staudinger <sup>2</sup>, Roman Ullrich <sup>3</sup>, Felix Kraft <sup>3</sup>, Marine L. Andersson <sup>4</sup>, Bernd Jilma <sup>1</sup> and Christian Schoergenhofer <sup>1,\*</sup>

<sup>1</sup> Department of Clinical Pharmacology, Medical University of Vienna, 1090 Vienna, Austria; thorsten.bischof@meduniwien.ac.at (T.B.); bernd.jilma@meduniwien.ac.at (B.J.)

<sup>2</sup> Intensive Care Unit 13i2, Department of Medicine 1, Medical University of Vienna, 1090 Vienna, Austria; nina.buchtele@meduniwien.ac.at (N.B.); thomas.staudinger@meduniwien.ac.at (T.S.)

<sup>3</sup> Department of Anesthesiology, Medical University of Vienna, 1090 Vienna, Austria; roman.ullrich@meduniwien.ac.at (R.U.); felix.kraft@meduniwien.ac.at (F.K.)

<sup>4</sup> Division of Clinical Pharmacology, Department of Laboratory Medicine, Karolinska Institutet, Karolinska University Hospital, 141 86 Stockholm, Sweden; marine.andersson@regionstockholm.se

\* Correspondence: christian.schoergenhofer@meduniwien.ac.at; Tel.: +43-1-40400-29810

**Table S1.** Most frequently identified D-pDDIs.

| <b>Severity D-pDDIs of non-CARDS patients (n=100)</b>                      |                    |                     |                               |              |                  |
|----------------------------------------------------------------------------|--------------------|---------------------|-------------------------------|--------------|------------------|
| <b>Substance A</b>                                                         | <b>Substance B</b> | <b>Organ system</b> | <b>potential consequences</b> | <b>PD/PK</b> | <b>frequency</b> |
| Propofol                                                                   | Vasopressin        | CV                  | risk of QTc prolongation      | PD           | 21               |
| Amiodarone                                                                 | Propofol           | CV                  | risk of QTc prolongation      | PD           | 13               |
| Fluconazole                                                                | Propofol           | CV                  | risk of QTc prolongation      | PD           | 11               |
| Erythromycin                                                               | Midazolam          | CNS                 | CNS depression                | PK           | 11               |
| Midazolam                                                                  | Voriconazole       | CNS                 | CNS depression                | PK           | 9                |
| Amiodarone                                                                 | Vasopressin        | CV                  | risk of QTc prolongation      | PD           | 7                |
| Linezolid                                                                  | Piritramide        | general             | serotonergic effects          | PD           | 7                |
| Fluconazole                                                                | Midazolam          | CNS                 | CNS depression                | PK           | 7                |
| Dobutamine                                                                 | Vasopressin        | CV                  | risk of QTc prolongation      | PD           | 6                |
| <b>Severity D-pDDIs of CARDS patients (n=89)</b>                           |                    |                     |                               |              |                  |
| Erythromycin                                                               | Midazolam          | CNS                 | CNS depression                | PK           | 26               |
| Amiodarone                                                                 | Propofol           | CV                  | risk of QTc prolongation      | PD           | 13               |
| Midazolam                                                                  | Voriconazole       | CNS                 | CNS depression                | PK           | 13               |
| Propofol                                                                   | Vasopressin        | CV                  | risk of QTc prolongation      | PD           | 7                |
| Erythromycin                                                               | Voriconazole       | CV                  | cardiac arrest                | PK           | 6                |
| Fluconazole                                                                | Propofol           | CV                  | risk of QTc prolongation      | PD           | 5                |
| Amiodarone                                                                 | Vasopressin        | CV                  | risk of QTc prolongation      | PD           | 4                |
| Dobutamine                                                                 | Vasopressin        | CV                  | risk of QTc prolongation      | PD           | 4                |
| Linezolid                                                                  | Piritramide        | general             | serotonergic effects          | PD           | 4                |
| <b>Severity D-pDDIs of no-ECMO treatment (both ARDS conditions) (n=85)</b> |                    |                     |                               |              |                  |
| Propofol                                                                   | Vasopressin        | CV                  | risk of QTc prolongation      | PD           | 12               |
| Erythromycin                                                               | Midazolam          | CNS                 | CNS depression                | PK           | 11               |
| Amiodarone                                                                 | Propofol           | CV                  | risk of QTc prolongation      | PD           | 8                |
| Fluconazole                                                                | Propofol           | CV                  | risk of QTc prolongation      | PD           | 6                |
| Midazolam                                                                  | Voriconazole       | CNS                 | CNS depression                | PK           | 5                |
| Citalopram                                                                 | Levofloxacin       | CV                  | risk of QTc prolongation      | PD           | 3                |
| Linezolid                                                                  | Piritramide        | general             | serotonergic effects          | PD           | 3                |
| Fluconazole                                                                | Midazolam          | CNS                 | CNS depression                | PK           | 3                |
| Propofol                                                                   | Sotalol            | CV                  | risk of QTc prolongation      | PD           | 3                |
| <b>Severity D-pDDIs of ECMO treatment (both ARDS conditions) n=104</b>     |                    |                     |                               |              |                  |
| Erythromycin                                                               | Midazolam          | CNS                 | CNS depression                | PK           | 26               |
| Amiodarone                                                                 | Propofol           | CV                  | risk of QTc prolongation      | PD           | 18               |
| Midazolam                                                                  | Voriconazole       | CNS                 | CNS depression                | PK           | 17               |
| Propofol                                                                   | Vasopressin        | CV                  | risk of QTc prolongation      | PD           | 16               |
| Fluconazole                                                                | Propofol           | CV                  | risk of QTc prolongation      | PD           | 10               |
| Amiodarone                                                                 | Vasopressin        | CV                  | risk of QTc prolongation      | PD           | 9                |
| Dobutamine                                                                 | Vasopressin        | CV                  | risk of QTc prolongation      | PD           | 9                |
| Linezolid                                                                  | Piritramide        | general             | serotonergic effects          | PD           | 7                |
| Erythromycin                                                               | Voriconazole       | CV                  | cardiac arrest                | PK           | 6                |

ARDS = acute respiratory distress syndrome, CARDS = coronavirus disease-2019 associated acute respiratory distress syndrome, CNS = central nervous system, CV = cardiovascular, PK = pharmacokinetic, PD = pharmacodynamic, ECMO = extracorporeal membrane oxygenation, pDDI = potential drug-drug-interaction, D = clinically relevant interaction that is best avoided

**Table S2.** Demographics and pDDIs of patients in the subgroup analysis.

|                               | Overall    | non-CARDS  | CARDS      | no ECMO<br>(both ARDS<br>conditions) | ECMO (both<br>ARDS condi-<br>tions) |
|-------------------------------|------------|------------|------------|--------------------------------------|-------------------------------------|
| <b>included patients, n</b>   | 20 (100)   | 10 (100)   | 10 (100)   | 8 (100)                              | 12 (100)                            |
| <b>Sex, female (%)</b>        | 5 (25)     | 4 (40)     | 1 (10)     | 2 (25)                               | 3 (25)                              |
| <b>Age, median (IQR)</b>      | 56 (46-61) | 56 (54-61) | 56 (34-62) | 58 (33-63)                           | 56 (53-61)                          |
| <b>ICU days, median (IQR)</b> | 22 (16-24) | 17 (15-22) | 24 (21-26) | 19 (16-26)                           | 22 (16-24)                          |

ICU = intensive care unit, ARDS = acute respiratory distress syndrome, CARDS = coronavirus disease-2019 associated acute respiratory distress syndrome, ECMO = extracorporeal membrane oxygenation, pDDI = potential drug-drug-interaction

**Table S3.** Detailed differences in pDDIs between the two different analytic methods

| Drug elimination analysis |               |                   |                |                  |                                        |       |
|---------------------------|---------------|-------------------|----------------|------------------|----------------------------------------|-------|
| ID                        | pDDI severity | Substance A       | Substance B    | Organ system     | potential consequences                 | PD/PK |
| 2                         | C             | Hydrocortisone    | Clarithromycin | PK               | increased hydrocortisone concentration | PK    |
| 5                         | D             | Amiodaron         | Levofloxacin   | CV               | risk of QTc prolongation               | PD    |
| 5                         | C             | Amiodaron         | Quetiapine     | CV               | risk of QTc prolongation               | PD    |
| 5                         | B             | Amiodaron         | Trazodone      | CV               | risk of QTc prolongation               | PD    |
| 5                         | C             | Amiodaron         | Metronidazole  | CV               | risk of QTc prolongation               | PD    |
| 6                         | D             | Amiodaron         | Erythromycin   | PK               | increased amiodaron concentration      | PK    |
| 6                         | D             | Amiodaron         | Propofol       | CV               | risk of QTc prolongation               | PD    |
| 8                         | C             | Erythromycin      | Propofol       | CV               | risk of QTc prolongation               | PD    |
| 8                         | B             | Erythromycin      | Prednisolone   | PK               | increased prednisolon concentration    | PK    |
| 9                         | B             | Trimethoprim      | Torsemide      | electrolytes     | hyponatremia                           | PD    |
| 10                        | C             | Azithromycin      | Propofol       | CV               | risk of QTc prolongation               | PD    |
| 10                        | B             | Enoxaparin        | Metamizole     | CV               | increased risk of bleeding             | PD    |
| 10                        | B             | Heparin           | Metamizole     | CV               | increased risk of bleeding             | PD    |
| 10                        | B             | Ondansetron       | Paracetamol    | PK               | reduced paracetamol effect             | PK    |
| 10                        | B             | Pantoprazole      | Quetiapine     | PK               | increased quetiapine concentration     | PK    |
| 12                        | B             | Cisatracurium     | Rocuronium     | musculo-skeletal | neuromuscular blocking                 | PD    |
| 12                        | B             | Enoxaparin        | Metamizole     | CV               | bleeding                               | PD    |
| 12                        | B             | Lorazepam         | Quetiapine     | PK               | increased quetiapine concentration     | PK    |
| 13                        | B             | Enoxaparin        | Metamizole     | CV               | bleeding                               | PD    |
| 17                        | B             | Amiodaron         | Naloxegol      | PK               | increased naloxegol concentration      | PK    |
| 17                        | B             | Dexamethasone     | Naloxegol      | PK               | decreased naloxegol concentration      | PK    |
| 17                        | C             | Isavuconazole     | Voriconazole   | PK               | increased isavuconazole concentration  | PK    |
| 24-hour analysis          |               |                   |                |                  |                                        |       |
| 2                         | C             | Urapidil          | Nebivolol      | CV               | hypotension                            | PD    |
| 2                         | B             | Butyl scopolamine | Metoclopramide | GI               | decreased propulsive effect            | PD    |
| 5                         | C             | Canrenoate        | Potassium      | electrolytes     | hyperkalemia                           | PD    |
| 6                         | C             | Propofol          | Erythromycin   | CV               | QTc                                    | PD    |
| 8                         | C             | Canrenoate        | Potassium      | electrolytes     | hyperkalemia                           | PD    |
| 9                         | C             | Potassium         | Trimethoprim   | electrolytes     | hyperkalemia                           | PD    |
| 10                        | B             | Midazolam         | Propofol       | CNS              | CNS depression                         | PD    |
| 10                        | B             | Propofol          | Ondansetron    | CV               | risk of QTc prolongation               | PD    |
| 15                        | C             | Nitroglycerin     | Heparin        | general          | resistance to heparin                  | PD    |
| 17                        | C             | Canrenoate        | Potassium      | electrolytes     | hyperkalemia                           | PD    |
| 18                        | B             | Furosemide        | ASA            | renal            | renal failure                          | PD    |

ASA = acetylsalicylic acid, PK = pharmacokinetic, PD = pharmacodynamic, pDDI = potential drug-drug-interaction, D = clinically relevant interaction that is best avoided, C = clinically relevant interaction that can be handled, B = clinical outcome of the interaction is uncertain and/or may vary
